# Supplementary material for: Tailored N-doped porous carbons via a MOF assembly process for high-performance CO2 uptake
Source: Royal Society of Chemistry journal article supplement (doi:10.1039/d0ma00789g), 2020-11-02
Supplement: d0ma00789g1.pdf [file d0ma00789g1.pdf]

## Tailored N-doped porous carbon via a MOF assembly process for high-performance CO<sub>2</sub> uptake

Fangyuan Gai,<sup>acd</sup> Dongying Zhu,<sup>a</sup> Yunhuan Wu,<sup>a</sup> Xiaogang Zhao,<sup>\*c</sup> Changhai Liang,<sup>b</sup> Zhenguo Liu,<sup>d</sup> Yunling Liu<sup>c</sup> and Tonghua Wang<sup>\*b</sup>

<sup>a</sup> Advanced Institute of Materials Science, School of Chemistry and biology, Changchun University of Technology, Changchun 130012, P.R. China. Electronic address: gaifangyuan@dlut.edu.cn

<sup>b</sup> State Key Laboratory of Fine Chemicals, Carbon Research Laboratory, School of Chemical Engineering, Dalian University of Technology, 2 Linggong Road, Dalian, 116024, China. Electronic address: wangth@dlut.edu.cn

<sup>c</sup> College of Chemistry, Jilin University, Changchun 130012, China.

<sup>d</sup> Research institute of Jilin petrochemical Co.Ltd., Petro. China, Jilin 132021, China

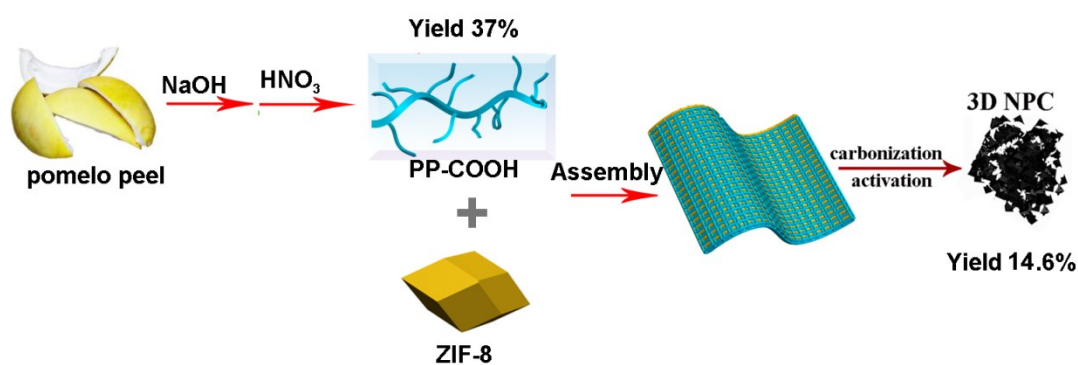

Scheme S1. The synthesis and the yield of 3D NPC

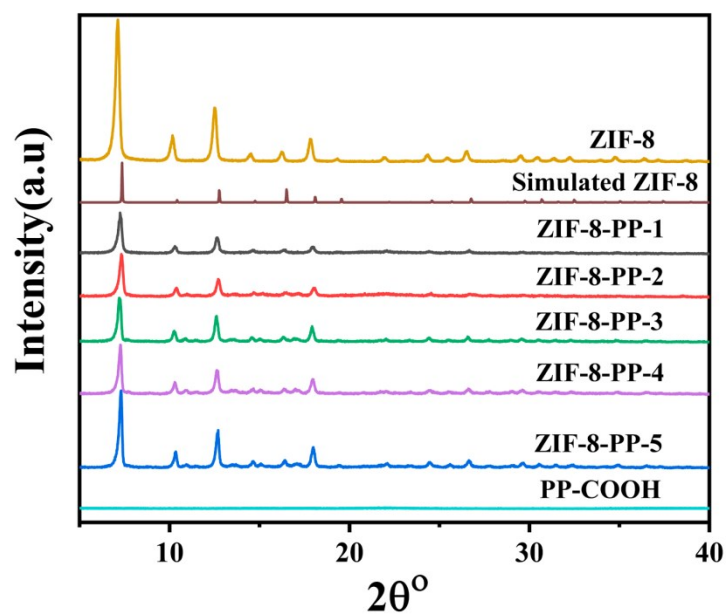

Fig. S1 XRD of ZIF-8 and ZIF-8-PP composites

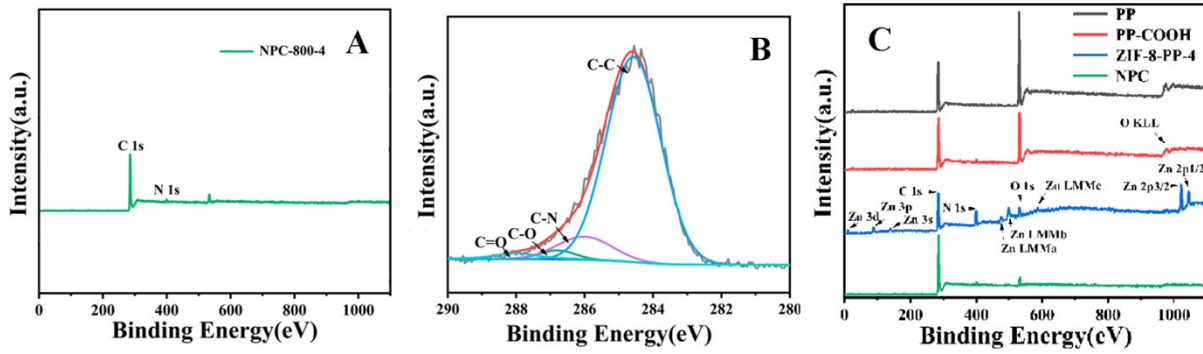

Fig. S2 (A) , (B) XPS of NPC-800-4 and (C) XPS of ZIF-8-PP composites

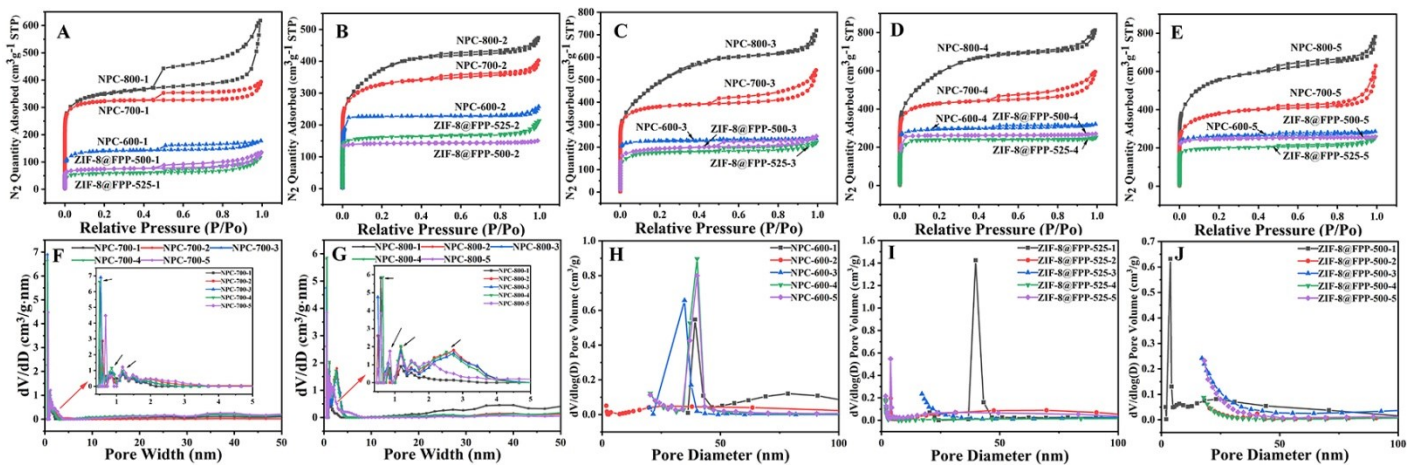

Fig.S3 The  $N_2$  adsorption and pore size distribution of NPC and ZIF-8-PP composite

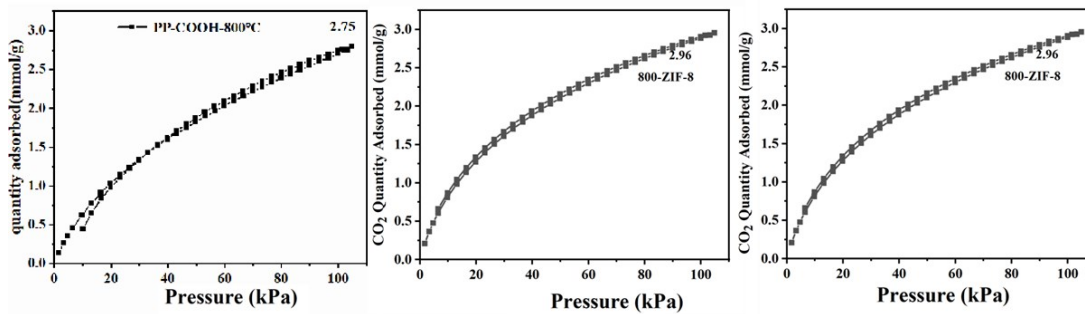

Fig. S4 The  $CO_2$  capture of carbon derived from ZIF-8, PP-COOH and the mixture of ZIF-8 and PP-COOH at 800 °C

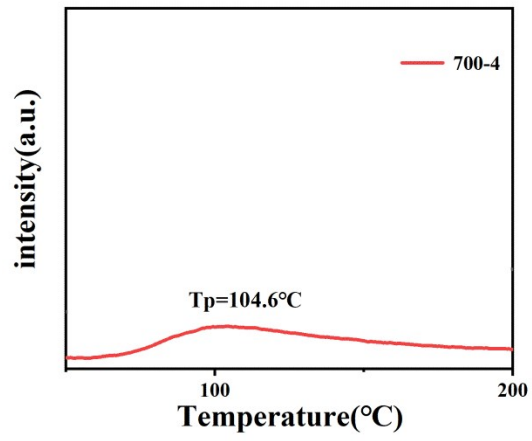

Fig. S5 The TPD of NPC-700-4

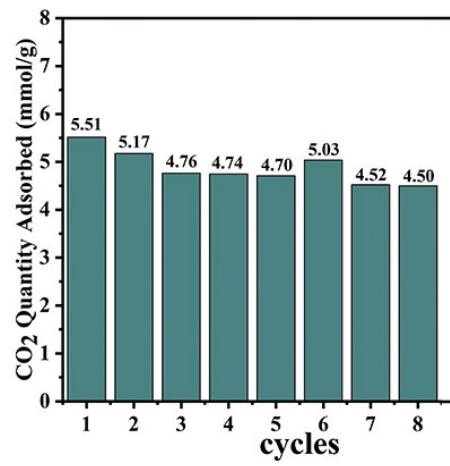

Fig. S6 8 cycles of CO<sub>2</sub> adsorption-desorption on NPC-800-4 at 25 °C

---
